# Supplementary material for: A facile chemical exfoliation method to obtain large size boron nitride nanosheets
Source: Royal Society of Chemistry journal article supplement (doi:10.1039/c2ce26446c), 2012-12-19
Supplement: c2ce26446c.pdf [file c2ce26446c.pdf]

# **A Facile Chemical Exfoliation Method to Obtain Large Size Boron Nitride Nanosheets**

**Miao Du,<sup>†,‡</sup> Yongzhong Wu,<sup>\*,†</sup> Xiaopeng Hao<sup>\*,†</sup>**

<sup>†</sup>State Key Lab of Crystal Materials, Shandong University, Jinan, 250100, China and

<sup>‡</sup>Department of Chemistry, Qilu Normal University, Jinan, 250200, China

## Supporting Information

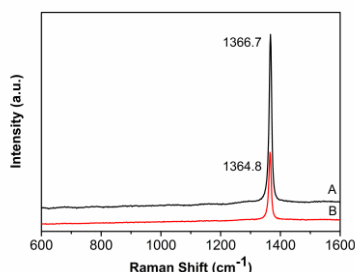

**Fig. S1** Raman spectra of BN powder (A) and BNNSs (B)

Figure S1 shows the typical Raman spectra of BNNSs and BN powder, where intense peak of the BNNSs appears at  $1364.8\text{ cm}^{-1}$ , attributed to the  $E_{2g}$  vibration mode of h-BN.<sup>1</sup> The intense peak of BN powder appears at  $1366.7\text{ cm}^{-1}$ . The full width at half-maximum (FWHM) of the  $E_{2g}$  mode is about  $5.08\text{ cm}^{-1}$  for the present BNNSs, which is larger than that of the BN powder ( $4.77\text{ cm}^{-1}$ ). A redshift and broadening of the  $E_{2g}$  vibration mode are typical for the h-BN thickness decreasing.<sup>2</sup> In addition, the intensity of the  $E_{2g}$  vibration mode of BNNSs decreases obviously, which may be attributed to the weakening interaction between layers during the exfoliation process of BN powder. All these results show that the BN powder was exfoliated into BNNSs by this facile chemical method, which is consistent with the results of XRD and FTIR.

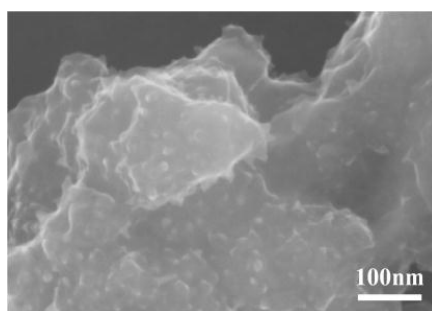

**Fig. S2** SEM image of the intermediate products before adding  $\text{H}_2\text{O}_2$

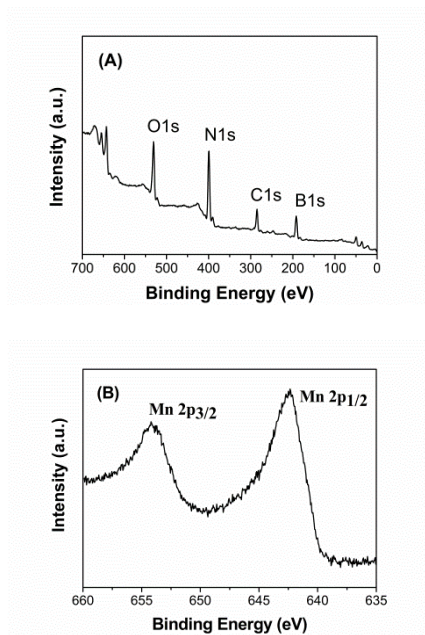

**Fig. S3** XPS spectrum of the intermediate products before adding  $\text{H}_2\text{O}_2$ : (A) XPS survey spectra of the intermediate products. (B) Mn2p XPS scans of the intermediate products.

In order to prove the exfoliation mechanism, the intermediate products before adding  $\text{H}_2\text{O}_2$  in this experiment were investigated by means of SEM and XPS. Figure S2 shows the SEM image of the intermediate samples. It can be seen that the BNNSs were exfoliated and some nanoparticles with diameters of 10-20 nm deposited on the BNNSs surface, which prevented the re-stacking of BNNSs due to van der Waals interactions. For this reason, we infer that the generated nanoparticles and their growth are of great benefit to further exfoliating BN and acquiring large size BNNSs. In order to further investigate the composition of nanoparticles, XPS spectrum (Figure S3) was recorded. Figure S3 shows two peaks at 642.25 and 653.85 eV, assignable to Mn  $2p_{3/2}$  and Mn  $2p_{1/2}$  for  $\text{MnO}_2$ , respectively.<sup>3</sup> Hence, the XPS results confirm the nanoparticles deposited on BNNSs are  $\text{MnO}_2$  nanoparticles. Based on SEM and XPS results, we think that  $\text{MnO}_2$  nanoparticles play a very important role in exfoliating BN, and this proved the previously-mentioned exfoliation mechanism feasible.

## REFERENCES

- (1) Geick, R.; Perry, C. H.; Rupprecht, G. *Phys. Rev.* 1966, 146, 543-547.
- (2) Nemanich, R. J.; Solin, S. A.; Martin, R. M. *Phys. Rev. B.* 1981, 23, 6348-6356.
- (3) Wang L.; Sakai N.; Ebina Y.; Takada K.; Sasaki T. *Chem. Mater.* 2005, 17, 1352-1357.
